# Supplementary material
Source: publisher figshare collection journal article supplement (https://karger.figshare.com/articles/dataset/_/5121514)
Supplement: Supplementary file 1 [file 1]

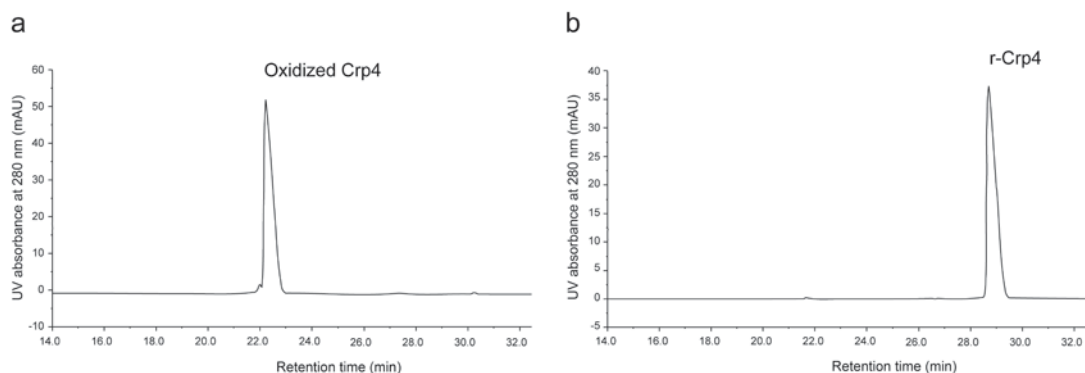

Online Supplementary Fig. S1. Purification of oxidized Crp4 and r-Crp4 by RP-HPLC. Oxidized Crp4 (a) and r-Crp4 (b) were purified by a C-18 column (SepaxHP-C18, 4.6x150 mm, 5  $\mu$ m, Sepax Technologies, Inc., Newark, DE) in 0.1% trifluoroacetic acid with an 18-36% acetonitrile gradient developed over 30 min at 1 ml/min.

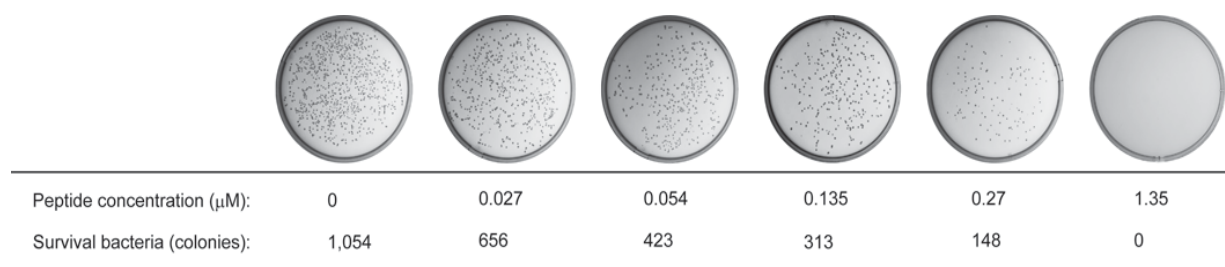

Online Supplementary Fig. S2. Bactericidal peptide assay. The colonies of *Salmonella enterica* serovar Typhimurium incubated with oxidized Crp4 are shown as a representative example. Exponential-phase bacteria cultured at 37°C were washed and the bacteria populations were adjusted to 1,000 CFU in 20  $\mu$ l. Then the bacteria solution was mixed with equivalent volumes of oxidized Crp4 with the final concentrations of 0.027, 0.054, 0.135, 0.27, and 1.35  $\mu$ M. The mixtures were plated after incubation for 1 h at 37°C. The assay measured bactericidal activity because the peptides affect bacteria only at the incubation time. Bacteria survival rates were determined from the numbers of surviving colonies relative to peptide-unexposed controls.
