# Supplementary material
Source: publisher figshare collection journal article supplement (https://karger.figshare.com/articles/dataset/_/5121514)
Supplement: Supplementary file 2 [file 1]

**Online supplementary Table S1. Bactericidal activities of oxidized Crp1 and r-Crp1**

| <i>Bacteria</i>                        | Survival rates (%) <sup>a</sup> of bacteria exposed to: |             |
|----------------------------------------|---------------------------------------------------------|-------------|
|                                        | Oxidized Crp1                                           | r-Crp1      |
| <b><i>Commensal bacteria</i></b>       |                                                         |             |
| <i>B. bifidum</i>                      | 97.7 ± 5.2                                              | 0 ± 0*      |
| <i>B. longum</i>                       | 0 ± 0                                                   | 0 ± 0‡      |
| <i>L. casei</i>                        | 71.1 ± 7.8                                              | 0 ± 0*      |
| <i>L. johnsonii</i>                    | 73.5 ± 13.0                                             | 0 ± 0*      |
| <i>B. fragilis</i>                     | 66.8 ± 6.2                                              | 15.1 ± 7.0* |
| <i>B. thetaiotaomicron</i>             | 89.8 ± 3.9                                              | 4.0 ± 8.1*  |
| <b><i>Non-commensal bacteria</i></b>   |                                                         |             |
| <i>S. enterica</i> serovar Typhimurium | 1.5 ± 0.5                                               | 1.9 ± 1.3‡  |
| <i>S. aureus</i>                       | 0 ± 0                                                   | 0 ± 0‡      |
| <i>E. coli</i>                         | 11.0 ± 2.1                                              | 0 ± 0‡      |
| <i>L. monocytogenes</i>                | 24.5 ± 8.0                                              | 10.0 ± 3.1‡ |
| <i>K. oxytoca</i>                      | 0 ± 0                                                   | 0 ± 0‡      |
| <i>P. vulgaris</i>                     | 7.9 ± 2.0                                               | 1.0 ± 0.4‡  |

<sup>a</sup> Values are means ± S.E., for survival rates of bacteria exposed to oxidized Crp1 or r-Crp1 (1.35 µM) performed in triplicate.

\*Value is significantly different ( $P < 0.01$ ) compared to that exposed to oxidized Crp1 as calculated by Student's *t* test.

‡ Not significant.
